# Supplementary material for: The applicability of commonly used predictive scoring systems in Indigenous Australians with sepsis: An observational study
Source: PubMed Central journal article supplement (PMC7375531; doi:10.1371/journal.pone.0236339), 2020-07-22

# PLOS ONE

## The applicability of commonly used predictive scoring systems in Indigenous Australians with sepsis: an observational study

--Manuscript Draft--

|                                |                                                                                                                                                                                                                                                                                                                                                                                                                                                                                                                                                                                                                                                                                                                                                                                                                                                                                                                                                                                                                                                                                                                                                                                                                                                                                                                                                                                                                                                                                                                                                                                                                                                                                                                                                                                                                                                                                                                                                                                                                                                                                                                                                                                                                                                                                                                                                                                                          |
|--------------------------------|----------------------------------------------------------------------------------------------------------------------------------------------------------------------------------------------------------------------------------------------------------------------------------------------------------------------------------------------------------------------------------------------------------------------------------------------------------------------------------------------------------------------------------------------------------------------------------------------------------------------------------------------------------------------------------------------------------------------------------------------------------------------------------------------------------------------------------------------------------------------------------------------------------------------------------------------------------------------------------------------------------------------------------------------------------------------------------------------------------------------------------------------------------------------------------------------------------------------------------------------------------------------------------------------------------------------------------------------------------------------------------------------------------------------------------------------------------------------------------------------------------------------------------------------------------------------------------------------------------------------------------------------------------------------------------------------------------------------------------------------------------------------------------------------------------------------------------------------------------------------------------------------------------------------------------------------------------------------------------------------------------------------------------------------------------------------------------------------------------------------------------------------------------------------------------------------------------------------------------------------------------------------------------------------------------------------------------------------------------------------------------------------------------|
| <b>Manuscript Number:</b>      | PONE-D-20-14432                                                                                                                                                                                                                                                                                                                                                                                                                                                                                                                                                                                                                                                                                                                                                                                                                                                                                                                                                                                                                                                                                                                                                                                                                                                                                                                                                                                                                                                                                                                                                                                                                                                                                                                                                                                                                                                                                                                                                                                                                                                                                                                                                                                                                                                                                                                                                                                          |
| <b>Article Type:</b>           | Research Article                                                                                                                                                                                                                                                                                                                                                                                                                                                                                                                                                                                                                                                                                                                                                                                                                                                                                                                                                                                                                                                                                                                                                                                                                                                                                                                                                                                                                                                                                                                                                                                                                                                                                                                                                                                                                                                                                                                                                                                                                                                                                                                                                                                                                                                                                                                                                                                         |
| <b>Full Title:</b>             | The applicability of commonly used predictive scoring systems in Indigenous Australians with sepsis: an observational study                                                                                                                                                                                                                                                                                                                                                                                                                                                                                                                                                                                                                                                                                                                                                                                                                                                                                                                                                                                                                                                                                                                                                                                                                                                                                                                                                                                                                                                                                                                                                                                                                                                                                                                                                                                                                                                                                                                                                                                                                                                                                                                                                                                                                                                                              |
| <b>Short Title:</b>            | The utility of predictive scores in Indigenous Australians with sepsis                                                                                                                                                                                                                                                                                                                                                                                                                                                                                                                                                                                                                                                                                                                                                                                                                                                                                                                                                                                                                                                                                                                                                                                                                                                                                                                                                                                                                                                                                                                                                                                                                                                                                                                                                                                                                                                                                                                                                                                                                                                                                                                                                                                                                                                                                                                                   |
| <b>Corresponding Author:</b>   | Josh Hanson<br>The Kirby Institute<br>Sydney, NSW AUSTRALIA                                                                                                                                                                                                                                                                                                                                                                                                                                                                                                                                                                                                                                                                                                                                                                                                                                                                                                                                                                                                                                                                                                                                                                                                                                                                                                                                                                                                                                                                                                                                                                                                                                                                                                                                                                                                                                                                                                                                                                                                                                                                                                                                                                                                                                                                                                                                              |
| <b>Keywords:</b>               | Intensive Care Medicine; Indigenous Health; Sepsis; Tropical Medicine; Infectious Diseases; Prediction scores                                                                                                                                                                                                                                                                                                                                                                                                                                                                                                                                                                                                                                                                                                                                                                                                                                                                                                                                                                                                                                                                                                                                                                                                                                                                                                                                                                                                                                                                                                                                                                                                                                                                                                                                                                                                                                                                                                                                                                                                                                                                                                                                                                                                                                                                                            |
| <b>Abstract:</b>               | <p><b>Background:</b> Indigenous Australians suffer a disproportionate burden of sepsis, however, the performance of scoring systems that predict mortality in Indigenous patients with critical illness is incompletely defined.</p> <p><b>Materials and methods:</b> The study was performed at an Australian tertiary-referral hospital between January 2014 and June 2017, and enrolled consecutive Indigenous and non-Indigenous adults admitted to ICU with sepsis. The ability of the ANZROD, APACHE-II, APACHE-III, SAPS-II, SOFA and qSOFA scores to predict death before ICU discharge in the two populations was compared.</p> <p><b>Results :</b> There were 442 individuals enrolled in the study, 145 (33%) identified as Indigenous. Indigenous patients were younger than non-Indigenous patients (median (interquartile range (IQR) 53 (43-60) versus 65 (52-73) years, <math>p=0.0001</math>) and comorbidity was more common (118/145 (81%) versus 204/297 (69%), <math>p=0.005</math>). Comorbidities that were more common in the Indigenous patients included diabetes mellitus (84/145 (58%) versus 67/297 (23%), <math>p&lt;0.0001</math>), renal disease (56/145 (39%) versus 29/297 (10%), <math>p&lt;0.0001</math>) and cardiovascular disease (58/145 (40%) versus 83/297 (28%), <math>p=0.01</math>). The use of supportive care (including vasopressors, mechanical ventilation and renal replacement therapy) was similar in Indigenous and non-Indigenous patients, and the two populations had an overall case-fatality rate that was comparable (17/145 (12%) and 38/297 (13%) (<math>p=0.75</math>)), although Indigenous patients died at a younger age (median (IQR): 54 (50-60) versus 70 (61-76) years, <math>p=0.0001</math>). There was no significant difference in the ability of any the scores to predict mortality in the two populations.</p> <p><b>Conclusions :</b> Although the crude case-fatality rates of Indigenous and non-Indigenous Australians admitted to ICU with sepsis is comparable, Indigenous patients die at a much younger age. Despite this, the ability of commonly used scoring systems to predict outcome in Indigenous Australians is similar to that of non-Indigenous Australians, supporting their use in ICUs with a significant Indigenous patient population and in clinical trials that enrol Indigenous Australians.</p> |
| <b>Order of Authors:</b>       | <p>Josh Hanson</p> <p>Simon Smith</p> <p>James Brooks</p> <p>Taissa Groch</p> <p>Sayonne Sivalingam</p> <p>Venessa Curnow</p> <p>Angus Carter</p> <p>Satyen Hargovan</p>                                                                                                                                                                                                                                                                                                                                                                                                                                                                                                                                                                                                                                                                                                                                                                                                                                                                                                                                                                                                                                                                                                                                                                                                                                                                                                                                                                                                                                                                                                                                                                                                                                                                                                                                                                                                                                                                                                                                                                                                                                                                                                                                                                                                                                 |
| <b>Additional Information:</b> |                                                                                                                                                                                                                                                                                                                                                                                                                                                                                                                                                                                                                                                                                                                                                                                                                                                                                                                                                                                                                                                                                                                                                                                                                                                                                                                                                                                                                                                                                                                                                                                                                                                                                                                                                                                                                                                                                                                                                                                                                                                                                                                                                                                                                                                                                                                                                                                                          |
| <b>Question</b>                | <b>Response</b>                                                                                                                                                                                                                                                                                                                                                                                                                                                                                                                                                                                                                                                                                                                                                                                                                                                                                                                                                                                                                                                                                                                                                                                                                                                                                                                                                                                                                                                                                                                                                                                                                                                                                                                                                                                                                                                                                                                                                                                                                                                                                                                                                                                                                                                                                                                                                                                          |

## Financial Disclosure

Enter a financial disclosure statement that describes the sources of funding for the work included in this submission. Review the [submission guidelines](#) for detailed requirements. View published research articles from [PLOS ONE](#) for specific examples.

This statement is required for submission and **will appear in the published article** if the submission is accepted. Please make sure it is accurate.

### Unfunded studies

Enter: *The author(s) received no specific funding for this work.*

### Funded studies

Enter a statement with the following details:

- Initials of the authors who received each award
- Grant numbers awarded to each author
- The full name of each funder
- URL of each funder website
- Did the sponsors or funders play any role in the study design, data collection and analysis, decision to publish, or preparation of the manuscript?
- **NO** - Include this sentence at the end of your statement: *The funders had no role in study design, data collection and analysis, decision to publish, or preparation of the manuscript.*
- **YES** - Specify the role(s) played.

\* typeset

The authors received no specific funding for this work.

## Competing Interests

Use the instructions below to enter a competing interest statement for this submission. On behalf of all authors, disclose any [competing interests](#) that could be perceived to bias this work—acknowledging all financial support and any other relevant financial or non-financial competing interests.

This statement **will appear in the published article** if the submission is accepted. Please make sure it is

The authors have declared that no competing interests exist.

accurate. View published research articles from [PLOS ONE](#) for specific examples.

#### **NO authors have competing interests**

Enter: *The authors have declared that no competing interests exist.*

#### **Authors with competing interests**

Enter competing interest details beginning with this statement:

*I have read the journal's policy and the authors of this manuscript have the following competing interests: [insert competing interests here]*

\* typeset

#### **Ethics Statement**

Enter an ethics statement for this submission. This statement is required if the study involved:

- Human participants
- Human specimens or tissue
- Vertebrate animals or cephalopods
- Vertebrate embryos or tissues
- Field research

Write "N/A" if the submission does not require an ethics statement.

General guidance is provided below. Consult the [submission guidelines](#) for detailed instructions. **Make sure that all information entered here is included in the Methods section of the manuscript.**

Ethics approval was obtained from the Far North Queensland Human Research Ethics Committee (HREC/17/QCH/93/AMO2). As the data were retrospective and de-identified, the Committee waived the requirement for informed consent.

**Format for specific study types**

**Human Subject Research (involving human participants and/or tissue)**

- Give the name of the institutional review board or ethics committee that approved the study
- Include the approval number and/or a statement indicating approval of this research
- Indicate the form of consent obtained (written/oral) or the reason that consent was not obtained (e.g. the data were analyzed anonymously)

**Animal Research (involving vertebrate animals, embryos or tissues)**

- Provide the name of the Institutional Animal Care and Use Committee (IACUC) or other relevant ethics board that reviewed the study protocol, and indicate whether they approved this research or granted a formal waiver of ethical approval
- Include an approval number if one was obtained
- If the study involved *non-human primates*, add *additional details* about animal welfare and steps taken to ameliorate suffering
- If anesthesia, euthanasia, or any kind of animal sacrifice is part of the study, include briefly which substances and/or methods were applied

**Field Research**

Include the following details if this study involves the collection of plant, animal, or other materials from a natural setting:

- Field permit number
- Name of the institution or relevant body that granted permission

**Data Availability**

Authors are required to make all data underlying the findings described fully available, without restriction, and from the time of publication. PLOS allows rare exceptions to address legal and ethical concerns. See the [PLOS Data Policy](#) and [FAQ](#) for detailed information.

Yes - all data are fully available without restriction

A Data Availability Statement describing where the data can be found is required at submission. Your answers to this question constitute the Data Availability Statement and **will be published in the article**, if accepted.

**Important:** Stating 'data available on request from the author' is not sufficient. If your data are only available upon request, select 'No' for the first question and explain your exceptional situation in the text box.

Do the authors confirm that all data underlying the findings described in their manuscript are fully available without restriction?

**Describe where the data may be found in full sentences. If you are copying our sample text, replace any instances of XXX with the appropriate details.**

- If the data are **held or will be held in a public repository**, include URLs, accession numbers or DOIs. If this information will only be available after acceptance, indicate this by ticking the box below. For example: *All XXX files are available from the XXX database (accession number(s) XXX, XXX).*
- If the data are all contained **within the manuscript and/or Supporting Information files**, enter the following: *All relevant data are within the manuscript and its Supporting Information files.*
- If neither of these applies but you are able to provide **details of access elsewhere**, with or without limitations, please do so. For example:

*Data cannot be shared publicly because of [XXX]. Data are available from the XXX Institutional Data Access / Ethics Committee (contact via XXX) for researchers who meet the criteria for access to confidential data.*

*The data underlying the results presented in the study are available from (include the name of the third party*

All relevant data are within the manuscript and its Supporting Information files. The final dataset has been submitted as an Excel file in this submission: "Final dataset for publication".

*and contact information or URL).*

- This text is appropriate if the data are owned by a third party and authors do not have permission to share the data.

\* typeset

Additional data availability information:

1 The applicability of commonly used predictive scoring systems in Indigenous Australians  
2 with sepsis: an observational study  
3

4 Josh Hanson<sup>1,2\*</sup>, Simon Smith<sup>1</sup>, James Brooks<sup>3,4</sup>, Taissa Groch<sup>5</sup>, Sayonne Sivalingam<sup>3</sup>,  
5 Venessa Curnow<sup>6</sup>, Angus Carter<sup>3</sup>, Satyen Hargovan<sup>3</sup>  
6

7 <sup>1</sup> Department of Medicine, Cairns Hospital, Cairns, Queensland, Australia  
8

9 <sup>2</sup> The Kirby Institute, University of New South Wales, Sydney, New South Wales, Australia  
10

11 <sup>3</sup> Department of Intensive Care Medicine, Cairns Hospital, Cairns, Queensland, Australia  
12

13 <sup>4</sup> Department of Anaesthetics, Gloucestershire Royal Hospital, Gloucester, United Kingdom  
14

15 <sup>5</sup> Department of Anaesthetics, Cairns Hospital, Cairns, Queensland, Australia  
16

17 <sup>6</sup> Aboriginal and Torres Strait Islander Health, Torres and Cape Hospital and Health Service,  
18 Cooktown, Queensland, Australia  
19  
20

21 \* Corresponding author:

22 Email: [jhanson@kirby.unsw.edu.au](mailto:jhanson@kirby.unsw.edu.au).  
23

24 Short title: The utility of predictive scores in Indigenous Australians with sepsis  
25  
26  
27  
28  
29  
30  
31  
32

## 33 **Abstract**

34 **Background:** Indigenous Australians suffer a disproportionate burden of sepsis, however, the  
35 performance of scoring systems that predict mortality in Indigenous patients with critical  
36 illness is incompletely defined.

37 **Materials and methods:** The study was performed at an Australian tertiary-referral hospital  
38 between January 2014 and June 2017, and enrolled consecutive Indigenous and non-  
39 Indigenous adults admitted to ICU with sepsis. The ability of the ANZROD, APACHE-II,  
40 APACHE-III, SAPS-II, SOFA and qSOFA scores to predict death before ICU discharge in the  
41 two populations was compared.

42 **Results:** There were 442 individuals enrolled in the study, 145 (33%) identified as Indigenous.  
43 Indigenous patients were younger than non-Indigenous patients (median (interquartile range  
44 (IQR) 53 (43-60) versus 65 (52-73) years,  $p=0.0001$ ) and comorbidity was more common  
45 (118/145 (81%) versus 204/297 (69%),  $p=0.005$ ). Comorbidities that were more common in  
46 the Indigenous patients included diabetes mellitus (84/145 (58%) versus 67/297 (23%),  
47  $p<0.0001$ ), renal disease (56/145 (39%) versus 29/297 (10%),  $p<0.0001$ ) and cardiovascular  
48 disease (58/145 (40%) versus 83/297 (28%),  $p=0.01$ ). The use of supportive care (including  
49 vasopressors, mechanical ventilation and renal replacement therapy) was similar in Indigenous  
50 and non-Indigenous patients, and the two populations had an overall case-fatality rate that was  
51 comparable (17/145 (12%) and 38/297 (13%) ( $p=0.75$ )), although Indigenous patients died at  
52 a younger age (median (IQR): 54 (50-60) versus 70 (61-76) years,  $p=0.0001$ ). There was no  
53 significant difference in the ability of any the scores to predict mortality in the two populations.

54 **Conclusions:** Although the crude case-fatality rates of Indigenous and non-Indigenous  
55 Australians admitted to ICU with sepsis is comparable, Indigenous patients die at a much  
56 younger age. Despite this, the ability of commonly used scoring systems to predict outcome in  
57 Indigenous Australians is similar to that of non-Indigenous Australians, supporting their use in



58 ICUs with a significant Indigenous patient population and in clinical trials that enrol Indigenous  
59 Australians.

60

61

62

63

64

65

66

67

68

69

70

71

72

73

74

75

76

## 77 **Introduction**

78 Globally, sepsis is estimated to kill 5.3 million people every year, predominantly in low- and  
79 middle income countries (1). Even in the well-resourced Australian health system, sepsis kills  
80 over 5000 people annually (2, 3). However, the case-fatality rate is not uniform across Australia  
81 (4). This can be partly explained by differences in the complexity of patient care at different  
82 sites, but other factors including patient age and demographics, the geographical location of  
83 the Intensive Care Unit (ICU), and the local prevalence of different pathogens also contribute  
84 (4).

85 In an effort to ensure that all Australians admitted to ICU are receiving high-quality care,  
86 predictive scoring systems are used to measure patients' disease severity and determine their  
87 expected outcomes (5-9). While these scores have limited utility in the management of  
88 individual patients, they can be used by institutions to benchmark ICU performance. They are  
89 also important in clinical trials where they can be used to help evaluate interventions by  
90 providing a measure of study patients' disease severity. However, these scoring systems are  
91 most frequently derived and validated in metropolitan referral centres in high-income settings,  
92 their predictive ability may differ in other patient populations (10, 11).

93 Indigenous Australians are disproportionately represented in Australian ICUs and sepsis is one  
94 of the most common indications for admission (12). Several studies have examined the  
95 characteristics of undifferentiated cohorts of Indigenous Australians admitted to ICU, and have  
96 identified that they are younger, have greater comorbidity and live more frequently in remote  
97 locations (12-15). While, the overall case-fatality rate of Indigenous Australians is similar to  
98 that of non-Indigenous Australians in these series, there has been limited examination of the  
99 comparative performance of predictive scoring systems in Indigenous patients (12-15). This is

100 important, because in some parts of the country, Indigenous Australians represent a significant  
101 proportion of ICU admissions (13, 14).

102 This study was performed to determine the applicability of commonly used predictive scoring  
103 systems in Indigenous Australians admitted to ICU with sepsis. It was hoped that the study  
104 might validate the use of these scoring systems in both Aboriginal and Torres Strait Islander  
105 Australians, which would support their use in future clinical sepsis trials enrolling Indigenous  
106 patients. It would also provide justification for their use in benchmarking the performance of  
107 ICUs with a greater proportion of Indigenous patients (16).

108

## 109 **Materials and methods**

110 This **retrospective study** used data collected in the ICU of Cairns Hospital, the only ICU in the  
111 Far North Queensland (FNQ) region. FNQ's population of 279,354 is dispersed across an area  
112 of 204,255 km<sup>2</sup>; approximately 17% of whom identify as Indigenous Australians (17).

113 Consecutive adults ( $\geq 18$  years) admitted between 1 January 2014 and 30 June 2017 to the ICU  
114 with a primary admission diagnosis of sepsis (**APACHE III-J** diagnostic codes 501-504) were  
115 eligible for the study. Demographic, clinical and laboratory data were collected and correlated  
116 with the patients' clinical course. **Comorbidities** were said to be present if documented in the  
117 medical record (MetaVision®). Hazardous alcohol consumption was defined as regular  
118 consumption of greater than 4 standard drinks/day. The data were collected by 4 members of  
119 the research team (SH SS TG JB) who met regularly to confirm uniformity of documentation.  
120 If patients were admitted to ICU more than once during the study period, only their first  
121 admission was included in the analysis.

122 All individuals receiving care in Queensland's public health system, are asked whether they  
123 identify as an Aboriginal Australian, a Torres Strait Islander Australian, both or neither.  
124 Commonly used disease severity prediction scores including the Australia and New Zealand  
125 Risk Of Death (ANZROD) score (5), the Acute Physiology, Age, Chronic Health Evaluation-  
126 II and III (APACHE-II and APACHE-III) scores (18), the Simplified Acute  
127 Physiology Score (SAPS) II score (19) and the quick SOFA (qSOFA) score (20) were  
128 calculated using variables collected at the time of ICU admission. The Sequential Organ Failure  
129 Assessment (SOFA) score was calculated using the worst values recorded in the first 24 hours  
130 of the ICU admission (9). The scores' ability to predict both death prior to ICU discharge and  
131 at 90 days was determined.

## 132 **Statistical analysis**

133 Data were de-identified, entered in an electronic database (Microsoft Excel) and analysed using  
134 statistical software (Stata version 14.2). Groups were compared using the Kruskal-Wallis, Chi-  
135 square test or Fisher's exact test where appropriate. Multivariate analysis was performed using  
136 backwards stepwise logistic regression. The Indigenous population was further examined by  
137 dividing the Indigenous population into those who identified as Aboriginal Australians and  
138 those who identified as Torres Strait Islander Australians. Those who identified as both, were  
139 not included in analyses comparing the two Indigenous populations.

140 The ability of the scores to predict death were determined by measuring the area under receiver  
141 operator characteristic (AUROC) curves, the optimal cut-off for the tests for the different  
142 populations were determined using Liu's method (21).

143

144

## 145 **Ethics approval**

146 Ethics approval was obtained from the Far North Queensland Human Research Ethics  
147 Committee (HREC/17/QCH/93/AMO2). As the data were retrospective and de-identified, the  
148 Committee waived the requirement for informed consent.

149

## 150 **Results**

151 There were 442 individuals admitted to ICU for sepsis, on 500 occasions, during the study  
152 period. Their median (interquartile range (IQR)) age at their first presentation was 59 (48-70)  
153 years, 238 (54%) were male. Of the 442 patients, 145 (33%) identified as Indigenous  
154 Australians, 94 (65%) identified as Aboriginal, 36 (25%) identified as Torres Strait Islanders,  
155 while 15 (10%) identified as both. Among the 442 patients, 416 (94%) were FNQ residents;  
156 Indigenous patients were more likely to reside in a rural or remote location than non-Indigenous  
157 patients (88/144 (61%) versus 128/272 (47%),  $p=0.006$ ).

## 158 **Patient characteristics**

159 Indigenous patients were younger than non-Indigenous patients (median (IQR) 53 (43-60)  
160 versus 65 (52-73) years,  $p=0.0001$ ) and were more likely to have a significant comorbidity  
161 (118/145 (81%) versus 204/297 (69%),  $p=0.005$ ).

162 Indigenous patients were more likely to have diabetes mellitus than non-Indigenous patients  
163 (odds ratio (OR): 4.7, 95% confidence interval (CI): 3.1-7.2), which contributed to a  
164 significantly greater burden of cardiovascular disease and renal disease (table 1). Diabetes was  
165 more common in Torres Strait Islanders than Aboriginal Australians (27/36 (75%) versus 48/94  
166 (51%),  $p=0.01$ ). No fewer than 32/145 (22%) Indigenous patients had a history of sepsis (prior  
167 hospitalisation with APACHE III-J diagnostic codes 501-504).

168 While Indigenous patients, as a group, were more likely to have a history of hazardous alcohol  
169 or tobacco use, hazardous alcohol use was more common in the Aboriginal patients than in  
170 Torres Strait Islanders (49/94 (52%) versus 7/36 (9%) (p=0.001). The difference in smoking  
171 rates between Aboriginal and Torres Strait Islanders failed to reach statistical significance  
172 (63/94 (67%) versus 18/36 (50%), p=0.07). Other demographic characteristics of the cohort  
173 and their comorbidities - stratified by Indigenous status - are presented in table 1.

## 174 **Nature of the sepsis**

175 The commonest presumed source of sepsis was the respiratory tract, although skin and soft  
176 tissue infections (SSTI) were also common and occurred more frequently in Indigenous  
177 patients, particularly those with diabetes (31/41 (76%) Indigenous patients with a SSTI were  
178 diabetic, compared with 53/104 (51%) with another source, p=0.007). *Staphylococcus aureus*  
179 was the pathogen isolated most commonly and was responsible for 66 (15%) admissions; 13  
180 (18%) of the isolates were methicillin resistant. In general, however, drug resistant pathogens  
181 and “tropical” pathogens were relatively uncommon (table 2).

## 182 **Clinical and laboratory findings at presentation**

183 Renal impairment and metabolic acidosis were more common among Indigenous patients, but  
184 other laboratory findings in the Indigenous and non-Indigenous patients were similar (table 3).

## 185 **Supportive care**

186 The supportive care provided to the Indigenous and non-Indigenous patients was very similar.  
187 While a greater proportion of Indigenous patients required renal replacement therapy (RRT),  
188 this did not reach statistical significance (19/145 (13%) versus 27/297 (9%), p=0.20) (table 4).

189

## 190 **Case-fatality rate**

191 There were 55 deaths in the cohort prior to ICU discharge: 17/145 (12%) Indigenous patients  
192 versus 38/297 (13%) non-Indigenous patients,  $p=0.75$ . There were 14 (15%) deaths among the  
193 94 Aboriginal Australians and 2 (6%) among the 36 Torres Strait Islander Australians ( $p=0.23$ ).  
194 There was one (7%) death among the 15 who identified as both Aboriginal and Torres Strait  
195 Islander Australians.

196 Patients that died before ICU discharge were older than those  that survived (median (IQR): 62  
197 (54-73) versus 59 (46-69) years),  $p=0.01$ ) and more likely to have a significant comorbidity  
198 (47/55 (85%) versus 275/387 (71%),  $p=0.03$ ). Among the 442 FNQ residents,  29/50 (58%)  
199 living in a rural or remote location died compared with 187/366 (51%), with an urban address  
200 ( $p=0.36$ ). In a multivariate analysis model which included age, Indigenous status, significant  
201 comorbidity and remote or rural residence, only age had a statistically significant association  
202 with death (OR: 1.03 (95%CI): 1.01-1.05),  $p=0.007$ ).

203  At 90 days, 93/442 (21%) had died. Death at 90 days was linked to age ( $p=0.0001$ ), but not  
204 to Indigenous status ( $p=0.26$ ) or rural/remote residence ( $p=0.29$ ). Indigenous patients,  
205 however, died at a younger age than non-Indigenous patients (median (IQR): 56 (52-62) versus  
206 68 (61-76) years,  $p=0.0001$ ).

## 207 **Disease severity scores and their ability to predict death**

208 The severity scores of the Indigenous and non-Indigenous patients were similar (table 5). There  
209 was no statistically significant difference in the ability of the various severity scores to predict  
210 death in Indigenous and non-Indigenous patients (tables 6 and 7). Among Indigenous patients,  
211 the ANZROD and APACHE-III scores had the highest AUROC curve (0.85 (95% CI: 0.77-  
212 0.92 and 0.84 (95% CI: 0.76-0.92), although these values were only statistically superior to  
213 that of the qSOFA scores (tables 6 and 7). The very low case-fatality rate in the Torres Strait

214 Islanders and relatively small sample size precluded meaningful comparison of the relative  
215 performance of the prediction scores in Aboriginal and Torres Strait Islanders.

## 216 **Discussion**

217 In this cohort of ICU patients with sepsis there were significant differences in the age, burden  
218 of comorbidities and source of infection between Indigenous and non-Indigenous individuals.  
219 However, the ability of commonly used disease severity scoring systems to predict mortality  
220 in the two populations was similar.

221 FNQ, in tropical Australia, shares a border with Papua New Guinea and has a unique blend of  
222 infectious diseases; it has the country's highest incidence of leptospirosis and an increasing  
223 incidence of melioidosis and rickettsial disease (22-24). The rates of methicillin-resistance in  
224 *S. aureus* isolates are among the highest reported in the country, while antibiotic resistance in  
225 other common pathogens is also increasing (25, 26). The population is widely dispersed across  
226 a large geographical area and there are very limited specialist services outside the  
227 administrative hub of Cairns. It is a region which contains 3 of the 10 most socio-economically  
228 disadvantaged local government areas in the country, all 3 are communities with a  
229 predominantly Indigenous population (27). It is the only part of Australia which has the  
230 homelands of both Aboriginal and Torres Strait Islander Australians, peoples that are  
231 frequently conflated but who are ethnologically quite distinct. All these factors might be  
232 expected to have implications for local patterns of sepsis, its presentation and its outcomes (16,  
233 28-30). However, while Indigenous patients were younger, more likely to be live in a  
234 rural/remote location and have a significant comorbidity than non-Indigenous patients, the  
235 severity of their sepsis – as determined by commonly used predictive scoring systems was  
236 similar to that of non-Indigenous patients.



237 Although Indigenous Australians bear a greater burden of sepsis, there are surprisingly few  
238 studies that examine sepsis in the Indigenous population systematically. The demography and  
239 comorbidities in our series are very similar to that of a prospective study of sepsis in the  
240 Northern Territory, which also included patients that were not admitted to the ICU (16). That  
241 study identified that Indigenous Australians were over-represented in the cohort, suffered  
242 disproportionately from diabetes and renal disease, and reported higher rates of smoking and  
243 hazardous alcohol use. Although APACHE-II and SOFA scores were collected in the study,  
244 the comparability of their performance in Indigenous and non-Indigenous populations was not  
245 presented.

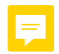

246 While there are relatively few published data examining the ICU care of Australian Indigenous  
247 patients with sepsis specifically, there are several studies that have examined the clinical  
248 characteristics and outcomes of Indigenous patients admitted to ICU (12-15). These studies are  
249 strikingly similar and show that Indigenous patients with critical illness are younger, have  
250 greater comorbidity and are more frequently admitted from remote locations than non-  
251 Indigenous patients. These studies also universally show that there is no difference in the  
252 proportion of Indigenous and non-Indigenous patients who die in the ICU. Whilst some authors  
253 have suggested that Indigenous deaths in ICU are therefore “healthcare preventable” (14), this  
254 represents a narrow view of healthcare, de-emphasising the primary holistic care that should  
255 prevent the hospitalisation in the first place. Whilst other authors have noted that there is “no  
256 mortality gap” between Indigenous and non-Indigenous Australians admitted to ICU (12), this  
257 overlooks the fact the Indigenous patients who are admitted to ICU are younger and are dying  
258 at a younger age. In an ICU series from the Northern Territory, 7% of both Indigenous and  
259 non-Indigenous patients admitted to the ICU died, but the Indigenous patients who died were  
260 much younger than their non-Indigenous counterparts (mean age of 45 versus 56) (13). This  
261 pattern was seen in our series: although the proportion of Indigenous patients and non-

262 Indigenous patients dying before ICU discharge was similar, the median age of death of  
263 Indigenous patients (56 years) was 12 years lower than that of the non-Indigenous patients. To  
264 close this gap, we need evidence-based strategies to address the unique challenges faced by  
265 Indigenous Australians in the country's health system. Our study shows that predictive scoring  
266 systems are a valid way of measuring disease severity among Indigenous Australians with  
267 sepsis and can therefore be used to compare the efficacy of interventions with confidence.

268 Our study has many limitations. As a single centre  trial, it reflects only the experience of a  
269 unique part of Australia; the applicability of the results to the broader Indigenous patient  
270 population requires validation, although the similarity between the Indigenous population seen  
271 in this study and those in other locations is striking  (12-16). The study was retrospective and  
272 examined only patients admitted to ICU and will therefore underestimate the true sepsis burden  
273 (31).

274 Clearly there is still much to do to address the disparity in health outcomes between Indigenous   
275 and non-Indigenous Australians (30). Once Indigenous Australians with sepsis enter ICU, they  
276 receive high quality care, but they are still dying at a much younger age than their non-  
277 Indigenous counterparts. Interventions at a community level including efforts to facilitate  
278 access to care, reduce crowding, enhance health literacy, improve sanitation and ensure  
279 appropriate nutrition are likely to be most helpful (32). At a primary health level optimising  
280 management of conditions like diabetes that predispose to sepsis and ensuring comprehensive  
281 vaccination, particularly for those at high risk are also likely to assist. Expanded programmes  
282 to assist with smoking cessation and encourage alcohol moderation are also essential (33, 34).  
283 However, even with optimal preventative interventions, patients will still require ICU care for  
284 sepsis. This study suggests that standard predictive scores predict outcomes in Indigenous

285 patients as well as they do in non-Indigenous patients and therefore may be used in future  
286 studies to examine strategies to enhance the care of all Australians

287

288

## 289 **Acknowledgements**

290 The authors would like to acknowledge all the health workers who were involved in the care  
291 of the patients.

292

## 293 **References**

- 294 1. Fleischmann C, Scherag A, Adhikari NK, Hartog CS, Tsaganos T, Schlattmann P, et al.  
295 Assessment of Global Incidence and Mortality of Hospital-treated Sepsis. Current Estimates  
296 and Limitations. *Am J Respir Crit Care Med*. 2016;193(3):259-72.
- 297 2. Sepsis epidemiology: Australian Sepsis Network; 2019 [Available from:  
298 <https://www.australiansepsisnetwork.net.au/healthcare-providers/sepsis-epidemiology>.
- 299 3. Kaukonen KM, Bailey M, Suzuki S, Pilcher D, Bellomo R. Mortality related to severe  
300 sepsis and septic shock among critically ill patients in Australia and New Zealand, 2000-  
301 2012. *JAMA*. 2014;311(13):1308-16.
- 302 4. Arise, Committee AAM. The outcome of patients with sepsis and septic shock  
303 presenting to emergency departments in Australia and New Zealand. *Crit Care Resusc*.  
304 2007;9(1):8-18.
- 305 5. Paul E, Bailey M, Pilcher D. Risk prediction of hospital mortality for adult patients  
306 admitted to Australian and New Zealand intensive care units: development and validation of  
307 the Australian and New Zealand Risk of Death model. *J Crit Care*. 2013;28(6):935-41.
- 308 6. Cook DA. Performance of APACHE III models in an Australian ICU. *Chest*.  
309 2000;118(6):1732-8.
- 310 7. Moreno RP, Metnitz PG, Almeida E, Jordan B, Bauer P, Campos RA, et al. SAPS 3--  
311 From evaluation of the patient to evaluation of the intensive care unit. Part 2: Development  
312 of a prognostic model for hospital mortality at ICU admission. *Intensive Care Med*.  
313 2005;31(10):1345-55.
- 314 8. Higgins TL, Teres D, Copes WS, Nathanson BH, Stark M, Kramer AA. Assessing  
315 contemporary intensive care unit outcome: an updated Mortality Probability Admission  
316 Model (MPMO-III). *Crit Care Med*. 2007;35(3):827-35.
- 317 9. Vincent JL, Moreno R, Takala J, Willatts S, De Mendonca A, Bruining H, et al. The  
318 SOFA (Sepsis-related Organ Failure Assessment) score to describe organ dysfunction/failure.  
319 On behalf of the Working Group on Sepsis-Related Problems of the European Society of  
320 Intensive Care Medicine. *Intensive Care Med*. 1996;22(7):707-10.

- 321 10. Bouch DC, Thompson JP. Severity scoring systems in the critically ill. Continuing  
322 Education in Anaesthesia Critical Care & Pain. 2008;8(5):181-5.
- 323 11. Moreno RP. Outcome prediction in intensive care: why we need to reinvent the  
324 wheel. *Curr Opin Crit Care*. 2008;14(5):483-4.
- 325 12. Secombe P, Brown A, McAnulty G, Pilcher D. Aboriginal and Torres Strait Islander  
326 patients requiring critical care: characteristics, resource use, and outcomes. *Crit Care*  
327 *Resusc*. 2019;21(3):200-11.
- 328 13. Stephens D. Critical illness and its impact on the Aboriginal people of the top end of  
329 the Northern Territory, Australia. *Anaesth Intensive Care*. 2003;31(3):294-9.
- 330 14. Trout MI, Henson G, Senthuran S. Characteristics and outcomes of critically ill  
331 Aboriginal and/or Torres Strait Islander patients in North Queensland. *Anaesth Intensive*  
332 *Care*. 2015;43(2):216-23.
- 333 15. Ho KM, Finn J, Dobb GJ, Webb SA. The outcome of critically ill Indigenous patients.  
334 *Med J Aust*. 2006;184(10):496-9.
- 335 16. Davis JS, Cheng AC, McMillan M, Humphrey AB, Stephens DP, Anstey NM. Sepsis in  
336 the tropical Top End of Australia's Northern Territory: disease burden and impact on  
337 Indigenous Australians. *Med J Aust*. 2011;194(10):519-24.
- 338 17. Lee A, Hanson J, Fox P, Spice G, Russell D, Boyd P. A decentralised, multidisciplinary  
339 model of care facilitates treatment of hepatitis C in regional Australia. *J Virus Erad*.  
340 2018;4(3):160-4.
- 341 18. Knaus WA, Wagner DP, Draper EA, Zimmerman JE, Bergner M, Bastos PG, et al. The  
342 APACHE III prognostic system. Risk prediction of hospital mortality for critically ill  
343 hospitalized adults. *Chest*. 1991;100(6):1619-36.
- 344 19. Le Gall JR, Lemeshow S, Saulnier F. A new Simplified Acute Physiology Score (SAPS II)  
345 based on a European/North American multicenter study. *JAMA*. 1993;270(24):2957-63.
- 346 20. Seymour CW, Liu VX, Iwashyna TJ, Brunkhorst FM, Rea TD, Scherag A, et al.  
347 Assessment of Clinical Criteria for Sepsis: For the Third International Consensus Definitions  
348 for Sepsis and Septic Shock (Sepsis-3). *JAMA*. 2016;315(8):762-74.
- 349 21. Liu X. Classification accuracy and cut point selection. *Stat Med*. 2012;31(23):2676-86.
- 350 22. Stewart AGA, Smith S, Binotto E, McBride WJH, Hanson J. The epidemiology and  
351 clinical features of rickettsial diseases in North Queensland, Australia: Implications for  
352 patient identification and management. *PLoS Negl Trop Dis*. 2019;13(7):e0007583.
- 353 23. Stewart JD, Smith S, Binotto E, McBride WJ, Currie BJ, Hanson J. The epidemiology  
354 and clinical features of melioidosis in Far North Queensland: Implications for patient  
355 management. *PLoS Negl Trop Dis*. 2017;11(3):e0005411.
- 356 24. Smith S, Kennedy BJ, Dermedoglou A, Poulgrain SS, Paavola MP, Minto TL, et al. A  
357 simple score to predict severe leptospirosis. *PLoS Negl Trop Dis*. 2019;13(2):e0007205.
- 358 25. Guthridge I, Smith S, Horne P, Hanson J. Increasing prevalence of methicillin-resistant  
359 *Staphylococcus aureus* in remote Australian communities: implications for patients and  
360 clinicians. *Pathology*. 2019;51(4):428-31.
- 361 26. Nofz L, Koppen J, De Alwis N, Smith S, Hanson J. The microbiology of ear cultures in a  
362 high-burden setting in tropical Australia: Implications for clinicians. *Clin Otolaryngol*.  
363 2019;44(6):1195-200.
- 364 27. 2071.0 - Census of Population and Housing: Reflecting Australia - Stories from the  
365 Census, 2016 Canberra, Australia: Australian Bureau of Statistics; 2018 [Available from:  
366 [https://www.abs.gov.au/ausstats/abs@.nsf/Lookup/by%20Subject/2071.0~2016~Main%20](https://www.abs.gov.au/ausstats/abs@.nsf/Lookup/by%20Subject/2071.0~2016~Main%20Features~Socio-Economic%20Advantage%20and%20Disadvantage~123)  
367 [Features~Socio-Economic%20Advantage%20and%20Disadvantage~123](https://www.abs.gov.au/ausstats/abs@.nsf/Lookup/by%20Subject/2071.0~2016~Main%20Features~Socio-Economic%20Advantage%20and%20Disadvantage~123)].

368 28. Tong SY, van Hal SJ, Einsiedel L, Currie BJ, Turnidge JD, Australian New Zealand  
369 Cooperative on Outcomes in Staphylococcal S. Impact of ethnicity and socio-economic  
370 status on Staphylococcus aureus bacteremia incidence and mortality: a heavy burden in  
371 Indigenous Australians. BMC Infect Dis. 2012;12:249.

372 29. Tosas Auguet O, Betley JR, Stabler RA, Patel A, Ioannou A, Marbach H, et al. Evidence  
373 for Community Transmission of Community-Associated but Not Health-Care-Associated  
374 Methicillin-Resistant Staphylococcus Aureus Strains Linked to Social and Material  
375 Deprivation: Spatial Analysis of Cross-sectional Data. PLoS Med. 2016;13(1):e1001944.

376 30. The health and welfare of Australia's Aboriginal and Torres Strait Islander peoples.  
377 Cat. no. IHW 147. Canberra, Australia: Australian Institute of Health and Welfare; 2015.

378 31. Jolley RJ, Sawka KJ, Yergens DW, Quan H, Jette N, Doig CJ. Validity of administrative  
379 data in recording sepsis: a systematic review. Crit Care. 2015;19:139.

380 32. Aboriginal and Torres Strait Islander Health Performance Framework (HPF) report  
381 2017 Canberra: Australian Institute of Health and Welfare; 2017 [Cat. no: IHW  
382 194:[Available from: [https://www.aihw.gov.au/reports/indigenous-australians/health-  
383 performance-framework/contents/overview](https://www.aihw.gov.au/reports/indigenous-australians/health-performance-framework/contents/overview)].

384 33. Huttunen R, Heikkinen T, Syrjanen J. Smoking and the outcome of infection. J Intern  
385 Med. 2011;269(3):258-69.

386 34. Trevejo-Nunez G, Kolls JK, de Wit M. Alcohol Use As a Risk Factor in Infections and  
387 Healing: A Clinician's Perspective. Alcohol Res. 2015;37(2):177-84.

388

389

390

391

392

393

394

395

396

397

398

399

400

401

402

403

404

405

406 **Table 1 Demographic characteristics and comorbidities of the cohort, stratified by**  
 407 **Indigenous status**  
 408

| Variable                                        | Indigenous<br>n=145 | Non-Indigenous<br>n=297 | p       |
|-------------------------------------------------|---------------------|-------------------------|---------|
| Age                                             | 53 (43-60)          | 65 (52-73)              | 0.0001  |
| Male gender                                     | 68 (47%)            | 170 (57%)               | 0.04    |
| Residence in a remote location <sup>a</sup>     | 88/144 (61%)        | 128/272 (47%)           | 0.006   |
| Inter-hospital transfer                         | 56 (39%)            | 115 (39%)               | 0.98    |
| Admitted from Emergency Department              | 44 (30%)            | 95 (32%)                | 0.73    |
| Admitted from a nursing home                    | 0                   | 0                       | -       |
| Planned admission after surgery                 | 3 (2%)              | 2 (1%)                  | 0.34    |
| Admitted from hospital ward                     | 42 (29%)            | 83 (28%)                | 0.82    |
| Admission at night                              | 94 (65%)            | 182 (61%)               | 0.47    |
| Hazardous alcohol consumption                   | 58 (40%)            | 53 (18%)                | <0.0001 |
| Cigarette smoker                                | 88 (61%)            | 134 (45%)               | 0.002   |
| History of sepsis                               | 32 (22%)            | 30 (10%)                | 0.001   |
| History of cardiovascular disease               | 58 (40%)            | 83 (28%)                | 0.01    |
| History of respiratory disease                  | 31 (21%)            | 49 (17%)                | 0.21    |
| History of renal disease                        | 56 (39%)            | 29 (10%)                | <0.0001 |
| History of haematological disease or malignancy | 7 (5%)              | 29 (10%)                | 0.10    |
| History of liver disease                        | 18 (12%)            | 22 (7%)                 | 0.09    |
| History of diabetes mellitus                    | 84 (58%)            | 67 (23%)                | <0.0001 |
| History of metastatic cancer                    | 6 (4%)              | 29 (10%)                | 0.04    |
| Immunocompromised                               | 9 (6%)              | 52 (18%)                | 0.001   |
| Significant comorbidity                         | 118 (81%)           | 204 (69%)               | 0.005   |
| Body mass index                                 | 27 (22-33)          | 28 (24-33)              | 0.07    |

409 Absolute numbers (%) or median (interquartile range) are presented.

410 <sup>a</sup> Only includes the 416 Far North Queensland residents.

411

412

413

414

415

416

417

418

419

420

421

422

**Table 2 Source and aetiology of the sepsis, stratified by Indigenous status**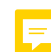

| Variable                               | Indigenous n=145 | Non- Indigenous n=297 | p      |
|----------------------------------------|------------------|-----------------------|--------|
| Respiratory source                     | 51 (35%)         | 97 (33%)              | 0.60   |
| Genitourinary source                   | 32 (22%)         | 64 (22%)              | 0.90   |
| Bone/joint source                      | 7 (5%)           | 6 (2%)                | 0.13   |
| Central nervous system source          | 0 (0%)           | 6 (2%)                | 0.18   |
| Skin/soft tissue source                | 41 (28%)         | 43 (14%)              | 0.0001 |
| Abdominal source                       | 13 (9%)          | 43 (14%)              | 0.10   |
| Other source                           | 10 (7%)          | 47 (16%)              | 0.01   |
| Bacterial infection                    | 103(71%)         | 194 (65%)             | 0.23   |
| Gram negative bacteria                 | 63 (43%)         | 131 (44%)             | 0.90   |
| Gram positive bacteria                 | 55 (38%)         | 84 (28%)              | 0.04   |
| Fungal infection                       | 7 (5%)           | 9 (3%)                | 0.42   |
| Viral infection                        | 10 (7%)          | 22 (7%)               | 0.85   |
| Drug resistant organism                | 5 (3%)           | 11 (4%)               | 1.0    |
| Bacteraemia                            | 56 (39%)         | 128 (43%)             | 0.37   |
| Polymicrobial infection                | 34 (23%)         | 46 (15%)              | 0.04   |
| <i>Escherichia coli</i>                | 15 (10%)         | 44 (15%)              | 0.20   |
| <i>Staphylococcus aureus</i>           | 26 (18%)         | 40 (13%)              | 0.22   |
| Methicillin-resistant <i>S. aureus</i> | 7 (5%)           | 6 (2%)                | 0.13   |
| <i>Pseudomonas aeruginosa</i>          | 15 (10%)         | 28 (9%)               | 0.76   |
| <i>Klebsiella pneumoniae</i>           | 9 (6%)           | 15 (5%)               | 0.66   |
| Influenza A                            | 5 (3%)           | 13 (4%)               | 0.80   |
| <i>Burkholderia pseudomallei</i>       | 8 (6%)           | 8 (3%)                | 0.17   |
| <i>Streptococcus pyogenes</i>          | 16 (11%)         | 9 (3%)                | 0.001  |
| Leptospirosis                          | 0                | 11 (4%)               | 0.02   |
| <i>Streptococcus pneumoniae</i>        | 6 (4%)           | 10 (3%)               | 0.79   |
| <i>Pneumocystis jirovecii</i>          | 2 (1%)           | 4 (1%)                | 1.0    |
| <i>Mycobacterium tuberculosis</i>      | 0                | 1 (0.3%)              | 1      |
| <i>Plasmodium falciparum</i>           | 0                | 1 (0.3%)              | 1      |
| <i>Rickettsia australis</i>            | 1 (0.7%)         | 0                     | 0.33   |
| <i>Vibrio vulnificus</i>               | 1 (0.7%)         | 0                     | 0.33   |

423 Absolute numbers (%) presented.

424

425

426

427

428

429

430

431

432

433

434

435

436

**Table 3 Clinical and laboratory findings at presentation, stratified by Indigenous status**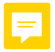

| Variable                               | Indigenous n=145     | Non- Indigenous n=297 | p      |
|----------------------------------------|----------------------|-----------------------|--------|
| Heart rate (beats/min)                 | 99 (89-118)          | 97 (81-114)           | 0.28   |
| Systolic blood pressure (mmHg)         | 107 (94-118)         | 106 (94-122)          | 0.42   |
| Mean arterial pressure (mmHg)          | 73 (66-82)           | 72 (65-83)            | 0.50   |
| Temperature (°C)                       | 36.8 (36.5-37.4)     | 36.9 (36.5-37.3)      | 0.53   |
| Respiratory rate (breaths/min)         | 20 (17-26)           | 20 (16-25)            | 0.99   |
| Glasgow Coma Score                     | 15 (14-15)           | 15 (14-15)            | 0.98   |
| Glucose (mmol/L)                       | 6.9 (5.0-9.4)        | 6.6 (5.4-8.5)         | 0.96   |
| Lactate (mmol/L)                       | 1.8 (1.1-3.0)        | 1.7 (1.1-2.8)         | 0.29   |
| pH                                     | 7.36 (7.24-7.42)     | 7.37 (7.30-7.43)      | 0.13   |
| PaO <sub>2</sub> /FiO <sub>2</sub>     | 291 (194-398)        | 269 (158-375)         | 0.02   |
| PaCO <sub>2</sub> (mmHg)               | 34 (27-39)           | 34 (29-42)            | 0.0496 |
| Bicarbonate (mmol/L)                   | 18 (15-21)           | 20 (17-23)            | 0.001  |
| Base excess (mmol/L)                   | -6.2 (-10.9 to -2.8) | -4.5 (-8.4 to -2.2)   | 0.004  |
| Anion gap                              | 9 (7-12)             | 9 (7-12)              | 0.44   |
| Haemoglobin (g/dL)                     | 100 (87-122)         | 111 (93-124)          | 0.007  |
| White cell count (x10 <sup>9</sup> /L) | 13.8 (9.3-21.9)      | 13.8 (7.9-22.2)       | 0.67   |
| Neutrophils (x10 <sup>9</sup> /L)      | 10.7 (7.1-19.2)      | 11.6 (6.2-19.4)       | 0.80   |
| Eosinophils (x10 <sup>9</sup> /L)      | 0 (0-0.1)            | 0(0-0)                | 0.001  |
| Platelets (x10 <sup>9</sup> /L)        | 170 (111-257)        | 1650(101-236)         | 0.17   |
| C-reactive protein (mg/L))             | 165 (67-295)         | 172 (85-286)          | 0.57   |
| Troponin I (ng/mL)                     | 0.07 (0.04-0.39)     | 0.11 (0.04-0.43)      | 0.85   |
| Prothrombin (seconds)                  | 16 (14-21)           | 16 (14-18)            | 0.07   |
| APTT (seconds)                         | 39 (34-47)           | 36 (31-40)            | 0.0001 |
| INR                                    | 1.5 (1.3-1.9)        | 1.4 (1.3-1.6)         | 0.03   |
| Fibrinogen (g/L)                       | 6.2 (4.6-8.3)        | 6.6 (4.9-8.2)         | 0.35   |
| Total Bilirubin (µmol/L)               | 18 (12-31)           | 20 (13-31)            | 0.31   |
| Conjugated bilirubin (µmol/L)          | 8 (4-19)             | 7 (4-15)              | 0.43   |
| Albumin (g/L)                          | 24 (20-27)           | 25 (22-29)            | 0.007  |
| Protein (g/L)                          | 58 (52-65)           | 52 (48-60)            | 0.0001 |
| AST (IU/mL)                            | 45 (21-104)          | 52 (27-106)           | 0.12   |
| ALT (IU/mL)                            | 25 (12-42)           | 35 (20-65)            | 0.0001 |
| GGT (IU/mL)                            | 41 (22-65)           | 51 (26-94)            | 0.01   |
| ALP (IU/mL)                            | 91 (69-134)          | 82 (57-119)           | 0.01   |
| LDH (IU/mL)                            | 333 (248-482)        | 329 (239-439)         | 0.43   |
| Sodium (mmol/L)                        | 133 (131-137)        | 135 (133-138)         | 0.0004 |
| Potassium (mmol/L)                     | 4.1 (3.6-4.8)        | 4.0 (3.7-4.5)         | 0.31   |
| Chloride (mmol/L)                      | 104 (99-109)         | 104 (100-108)         | 0.92   |
| Creatinine (µmol/L)                    | 162 (87-403)         | 118 (75-190)          | 0.0003 |
| eGFR (ml/min/1.73m <sup>2</sup> )      | 29 (11-65)           | 49 (24-80)            | 0.0002 |
| Calcium (mmol/L)                       | 2.2 (2.1-2.3)        | 2.2 (2.1-2.3)         | 0.99   |
| Magnesium (mmol/L)                     | 0.73 (0.66-0.87)     | 0.75 (0.65-0.88)      | 0.48   |
| Phosphate (mmol/L)                     | 1.5 (1.0-2.0)        | 1.1 (0.9-1.5)         | 0.0001 |

438 Median (Interquartile range) presented. PaO<sub>2</sub>/FiO<sub>2</sub>: ratio of arterial oxygen partial pressure (PaO<sub>2</sub> in mmHg) to  
 439 fractional inspired oxygen. PaCO<sub>2</sub>: arterial carbon dioxide partial pressure. APTT: activated partial  
 440 thromboplastin time; INR: International normalised ratio; AST: aspartate aminotransferase; ALT: alanine  
 441 aminotransferase; GGT: Gamma-glutamyl transferase; ALP: alkaline phosphatase; LDH: lactate dehydrogenase;  
 442 eGFR: estimated glomerular filtration rate.



443 **Table 4 Supportive care delivered to the cohort, stratified by Indigenous status**

| Variable                              | Indigenous n=145 | Non- Indigenous n=297 | p    |
|---------------------------------------|------------------|-----------------------|------|
| Vasopressors on admission             | 102 (70%)        | 204 (69%)             | 0.72 |
| Number of vasopressors required       | 1 (1-1)          | 1 (0-1)               | 0.89 |
| Antibiotics administered on admission | 142 (98%)        | 288 (97%)             | 0.56 |
| Endotracheal intubation               | 28 (19%)         | 64 (22%)              | 0.59 |
| Minute ventilation                    | 7.3 (5.8 - 8.8)  | 7.7 (6.6 – 9.0)       | 0.30 |
| PICC line                             | 40 (28%)         | 89 (30%)              | 0.61 |
| Central venous line                   | 61 (42%)         | 121 (41%)             | 0.79 |
| Arterial line                         | 122 (84%)        | 246 (83%)             | 0.73 |
| Nasogastric feeding                   | 28 (19%)         | 63 (21%)              | 0.64 |
| Indwelling urinary catheter           | 117 (81%)        | 252 (85%)             | 0.27 |
| Renal replacement therapy             | 19 (13%)         | 27 (9%)               | 0.20 |

444 Absolute numbers (%) and median (interquartile range) presented. PICC: Peripherally inserted central catheter

445

446

447

448

449

450

451

452

453

454

455

456

457

458

459

460

461

462

463

464

465

466

467

468

469

470

471

472

473 **Table 5 Severity score values on admission to ICU, stratified by Indigenous status**

| Variable   | number | Indigenous n=145 | Non- Indigenous n=297 | p    |
|------------|--------|------------------|-----------------------|------|
| qSOFA      | 348    | 1 (1-2)          | 1 (1-2)               | 0.83 |
| SOFA       | 378    | 9 (6-11)         | 8 (6-11)              | 0.20 |
| ANZROD     | 430    | 0.24 (0.10-0.44) | 0.23 (0.10-0.46)      | 0.86 |
| APACHE-II  | 430    | 21 (15-26)       | 20 (15-26)            | 0.65 |
| APACHE-III | 430    | 70 (52-87)       | 69 (53-87)            | 0.87 |
| SAPS-II    | 413    | 35 (25-51)       | 38 (28-58)            | 0.12 |

474 Median (interquartile range) presented. qSOFA: quick SOFA score; SOFA: Sequential Organ Failure Assessment  
 475 score; ANZROD: Australia and New Zealand Risk Of Death score; APACHE-II: Acute Physiology, Age, Chronic  
 476 Health Evaluation-II score; and APACHE-III: Acute Physiology, Age, Chronic Health Evaluation-III score;  
 477 SAPS-II: Simplified Acute Physiology Score.

478

479

480

481

482

483

484

**Table 6 Performance of the severity scores in predicting death before ICU discharge, stratified by Indigenous status**

| Severity score | Number of Indigenous patients in whom the score could be calculated | AUROC (95% CI)   | Optimal cut-off in Indigenous patients | Number of Non- Indigenous patients in whom the score could be calculated | AUROC (95% CI)   | Optimal cut-off in Non-Indigenous patients | p    |
|----------------|---------------------------------------------------------------------|------------------|----------------------------------------|--------------------------------------------------------------------------|------------------|--------------------------------------------|------|
| qSOFA          | 116                                                                 | 0.71 (0.57-0.84) | 2                                      | 232                                                                      | 0.58 (0.46-0.70) | 2                                          | 0.17 |
| SOFA           | 120                                                                 | 0.75 (0.64-0.87) | 10                                     | 258                                                                      | 0.72 (0.63-0.80) | 10                                         | 0.62 |
| ANZROD         | 138                                                                 | 0.85 (0.77-0.92) | 0.33                                   | 292                                                                      | 0.79 (0.71-0.87) | 0.35                                       | 0.32 |
| APACHE-II      | 138                                                                 | 0.78 (0.64-0.91) | 30                                     | 292                                                                      | 0.76 (0.67-0.84) | 27                                         | 0.61 |
| APACHE-III     | 138                                                                 | 0.84 (0.76-0.92) | 82                                     | 292                                                                      | 0.79 (0.71-0.87) | 88                                         | 0.37 |
| SAPS-II        | 136                                                                 | 0.80 (0.70-0.90) | 46                                     | 277                                                                      | 0.85 (0.78-0.92) | 66                                         | 0.40 |

qSOFA: quick SOFA score; SOFA: Sequential Organ Failure Assessment score; ANZROD: Australia and New Zealand Risk Of Death score; APACHE-II: Acute Physiology, Age, Chronic Health Evaluation-II score; and APACHE-III: Acute Physiology, Age, Chronic Health Evaluation-III score; SAPS-II: Simplified Acute Physiology Score.

**Table 7 Performance of the severity scores in predicting 90-day mortality, stratified by Indigenous status**

| Severity score | Number of Indigenous patients in whom the score could be calculated | AUROC (95% CI)   | Optimal cut-off in Indigenous patients | Number of Non-Indigenous patients in whom the score could be calculated | Non-Indigenous n=297 | Optimal cut-off in Non-Indigenous patients | p    |
|----------------|---------------------------------------------------------------------|------------------|----------------------------------------|-------------------------------------------------------------------------|----------------------|--------------------------------------------|------|
| qSOFA          | 116                                                                 | 0.66 (0.53-0.79) | 2                                      | 232                                                                     | 0.59 (0.50-0.68)     | 2                                          | 0.42 |
| SOFA           | 120                                                                 | 0.75 (0.64-0.85) | 11                                     | 258                                                                     | 0.66 (0.58-0.74)     | 9                                          | 0.22 |
| ANZROD         | 138                                                                 | 0.85 (0.79-0.92) | 0.33                                   | 292                                                                     | 0.78 (0.71-0.84)     | 0.29                                       | 0.09 |
| APACHE-II      | 138                                                                 | 0.74 (0.62-0.85) | 30                                     | 292                                                                     | 0.72 (0.65-0.79)     | 21                                         | 0.78 |
| APACHE-III     | 138                                                                 | 0.85 (0.78-0.92) | 73                                     | 292                                                                     | 0.77 (0.71-0.84)     | 75                                         | 0.13 |
| SAPS-II        | 136                                                                 | 0.78 (0.68-0.88) | 36                                     | 277                                                                     | 0.75 (0.69-0.82)     | 39                                         | 0.66 |

qSOFA: quick SOFA score; SOFA: Sequential Organ Failure Assessment score; ANZROD: Australia and New Zealand Risk Of Death score; APACHE-II: Acute Physiology, Age, Chronic Health Evaluation-II score; and APACHE-III: Acute Physiology, Age, Chronic Health Evaluation-III score; SAPS-II: Simplified Acute Physiology Score.

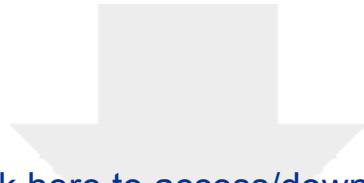

[Click here to access/download](#)

**Supporting Information**

Final dataset for publication.xlsx

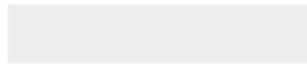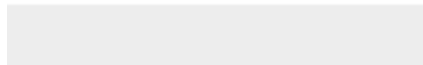

Supplement: pone.0236339.s002.pdf [file pone.0236339.s002.pdf]
